# Supplementary material
Source: PubMed Central journal article supplement (PMC3489043)

## Supplementary Information-

**Title-** Crystal Structures of the Ligand Binding Domain of a  $\alpha_7$  Nicotinic Receptor Chimera and its Complex with Agonist

**Authors-** Shu-Xing Li, Sun Huang, Nina Bren, Kaori Noridomi, Cosma D. Dellisanti, Steven M. Sine and Lin Chen

**Table S1-** Data collection and refinement statistics

---

|                                     | Apo Chimera (PDB ID 3SQ9)       |         |         | Epi/Chimera(PDB ID 3SQ6)        |         |         |
|-------------------------------------|---------------------------------|---------|---------|---------------------------------|---------|---------|
| a. Data collection                  |                                 |         |         |                                 |         |         |
| Space group                         | P2 <sub>1</sub>                 |         |         | P2 <sub>1</sub>                 |         |         |
| Unit cell                           |                                 |         |         |                                 |         |         |
| a, b, c (Å)                         | 79.123                          | 144.558 | 131.115 | 81.237                          | 141.069 | 130.207 |
| $\alpha, \beta, \gamma$ (°)         | 90.000                          | 102.462 | 90.000  | 90.000                          | 99.649  | 90.000  |
| Resolution (Å)                      | 50-3.1 (3.21-3.10) <sup>a</sup> |         |         | 50-2.8 (2.90-2.80) <sup>a</sup> |         |         |
| R <sub>sym</sub>                    | 0.086 (0.425)                   |         |         | 0.111(0.538)                    |         |         |
| I/ $\sigma$ (I)                     | 11.1 (1.7)                      |         |         | 10.7/(1.8)                      |         |         |
| Completeness (%)                    | 90.9 (54.1)                     |         |         | 86.4(55.9)                      |         |         |
| Redundancy                          | 3.4 (2.4)                       |         |         | 3.9(2.3)                        |         |         |
| Number of unique Reflections        | 47134                           |         |         | 61567                           |         |         |
| b. Refinement                       |                                 |         |         |                                 |         |         |
| Rwork/Rfree (%)                     | 0.265/0.290                     |         |         | 0.235/0.260                     |         |         |
| Number of non-H atoms               |                                 |         |         |                                 |         |         |
| Protein                             | 16470                           |         |         | 16572                           |         |         |
| Ligands                             |                                 |         |         |                                 |         |         |
| Epi                                 |                                 |         |         | 140                             |         |         |
| NAG                                 | 280                             |         |         | 210                             |         |         |
| Water                               |                                 |         |         | 16                              |         |         |
| Average B factors (Å <sup>2</sup> ) |                                 |         |         |                                 |         |         |
| Protein                             | 110.0                           |         |         | 62.9                            |         |         |
| ligands                             |                                 |         |         |                                 |         |         |
| Epi                                 |                                 |         |         | 39.2                            |         |         |
| NAG                                 | 147.7                           |         |         | 104.0                           |         |         |
| Water                               |                                 |         |         | 28.9                            |         |         |
| R.M.S. deviations                   |                                 |         |         |                                 |         |         |
| Bond lengths (Å)                    | 0.008                           |         |         | 0.009                           |         |         |
| Bond angles (°)                     | 1.3                             |         |         | 1.6                             |         |         |
| Ramachandran plot                   |                                 |         |         |                                 |         |         |
| Favored region (%)                  | 88.0                            |         |         | 90.0                            |         |         |
| Allowed region (%)                  | 8.8                             |         |         | 6.0                             |         |         |
| Outlier region (%)                  | 3.3                             |         |         | 4.0                             |         |         |

---

<sup>a</sup> Highest resolution shell shown in parentheses.

**Table S2-** Structure-based mutational analysis of the  $\alpha_7$  AChR expressed in 293 HEK cells: agonist competition against the initial rate of  $^{125}\text{I}$ - $\alpha$ -bungarotoxin binding.

| Mutant $\alpha_7$ AChR | Agonist     | Kd apparent, nM  | $n_H$           |
|------------------------|-------------|------------------|-----------------|
| Wild type $\alpha_7$   | Epibatidine | 17.3 $\pm$ 0.4   | 2.82 $\pm$ 0.17 |
| W53F                   | Epibatidine | 67.8 $\pm$ 6.6   | 1.22 $\pm$ 0.14 |
| Y191F                  | Epibatidine | 195 $\pm$ 3.8    | 2.43 $\pm$ 0.11 |
| Y91F                   | Epibatidine | 1,245 $\pm$ 53   | 2.22 $\pm$ 0.19 |
| Y184F                  | Epibatidine | 4,446 $\pm$ 34   | 2.73 $\pm$ 0.37 |
| W145F                  | Epibatidine | 38,280 $\pm$ 673 | 2.47 $\pm$ 0.10 |
| Wild type $\alpha_7$   | ACh         | 5,400 $\pm$ 130  | 2.58 $\pm$ 0.14 |
| R182V                  | ACh         | 887 $\pm$ 69     | 2.39 $\pm$ 0.25 |
| E185Q                  | ACh         | 543 $\pm$ 15     | 2.53 $\pm$ 0.14 |
| E181S                  | ACh         | 141 $\pm$ 13     | 1.18 $\pm$ 0.14 |
| Q37N                   | ACh         | 369 $\pm$ 31     | 1.53 $\pm$ 0.17 |

Parameters and standard errors were obtained by non-linear least-squares fits of the Hill equation to the data in Fig. 8, main text, using GraphPad Prism 5.0 software. The following mutations of the  $\alpha_7$  AChR showed undetectable or very low  $^{125}\text{I}$ - $\alpha$ -bungarotoxin binding: R179A, F196A, N108A, D160A.

**Fig. S1-** Construction of the  $\alpha_7$ /AChBP chimera. (a) Sequence of the  $\alpha_7$ /AChBP chimera aligned with that of human  $\alpha_7$  AChR. Identical residues are highlighted in orange, homologous residues in yellow. Secondary structural elements are shown above the sequences. (b) Regions of  $\alpha_7$  AChR (blue) and AChBP (orange) are mapped on the subunit structure of the chimera.

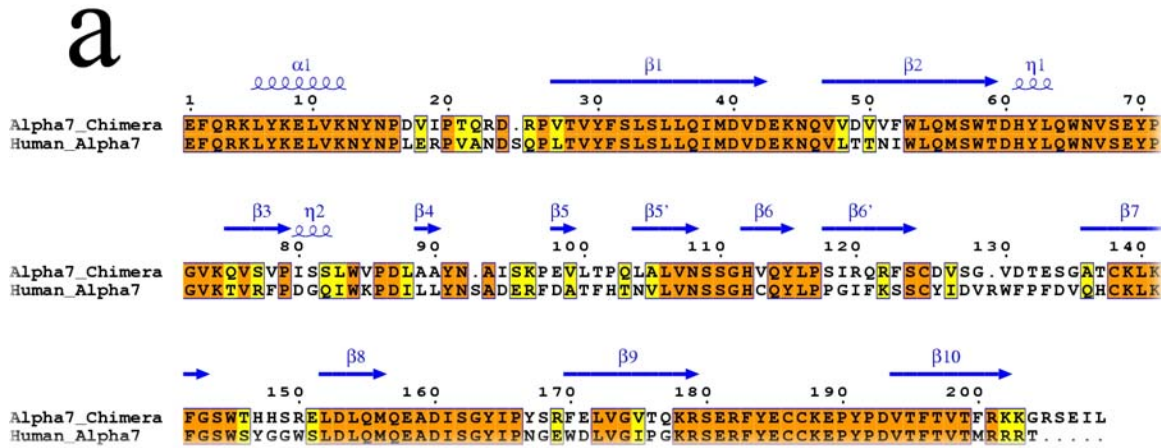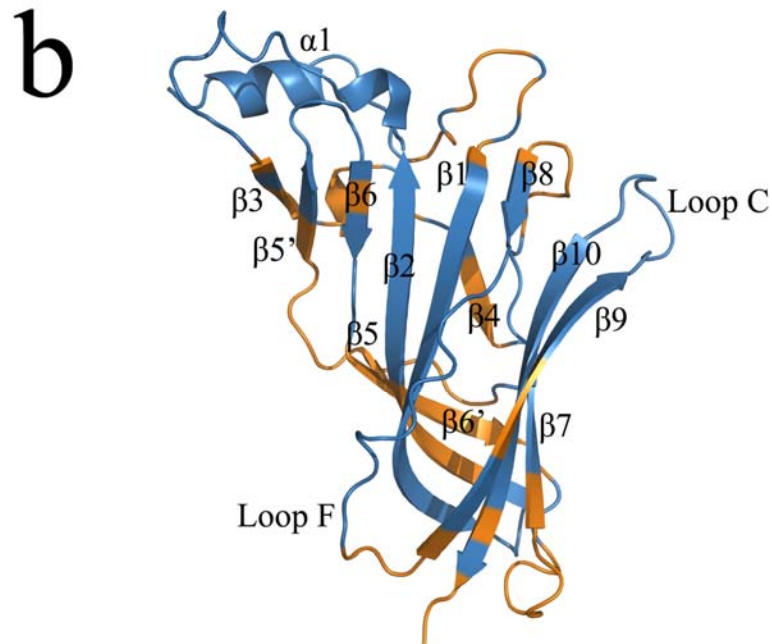

**Fig. S2-** Epibatidine binding to the  $\alpha_7$ /AChBP chimera. Purified  $\alpha_7$ /AChBP chimera was bound to anti-MF2 agarose and steady state binding of  $^{125}\text{I}$ -epibatidine (panel a) or competition of unlabeled +/-epibatidine against  $^{125}\text{I}$ -epibatidine (panel b) was measured using the method in ref. 36 of the main text. For panel b, a concentration of 3 nM  $^{125}\text{I}$ -epibatidine was used. Non-specific binding was determined in the presence of 10  $\mu\text{M}$  methylcaconitine (TOCRIS Bioscience). In panel a, the line is a least squares fit to the log-log data with a slope  $1.05 \pm 0.05$  (SE). In panel b, the curve is a non-linear fit of the Hill equation to the data with  $K_d=1.3 \pm 0.19 \mu\text{M}$  and  $n_H= 1.38 \pm 0.11$ . Note that the  $K_d$  for epibatidine obtained for the  $\alpha_7$ /AChBP chimera is greater than that obtained the  $\alpha_7$  AChR (Fig. 8, main text), but apparent affinities for the two proteins may not be comparable because the chimera lacks a pore domain allosterically linked to the binding domain.

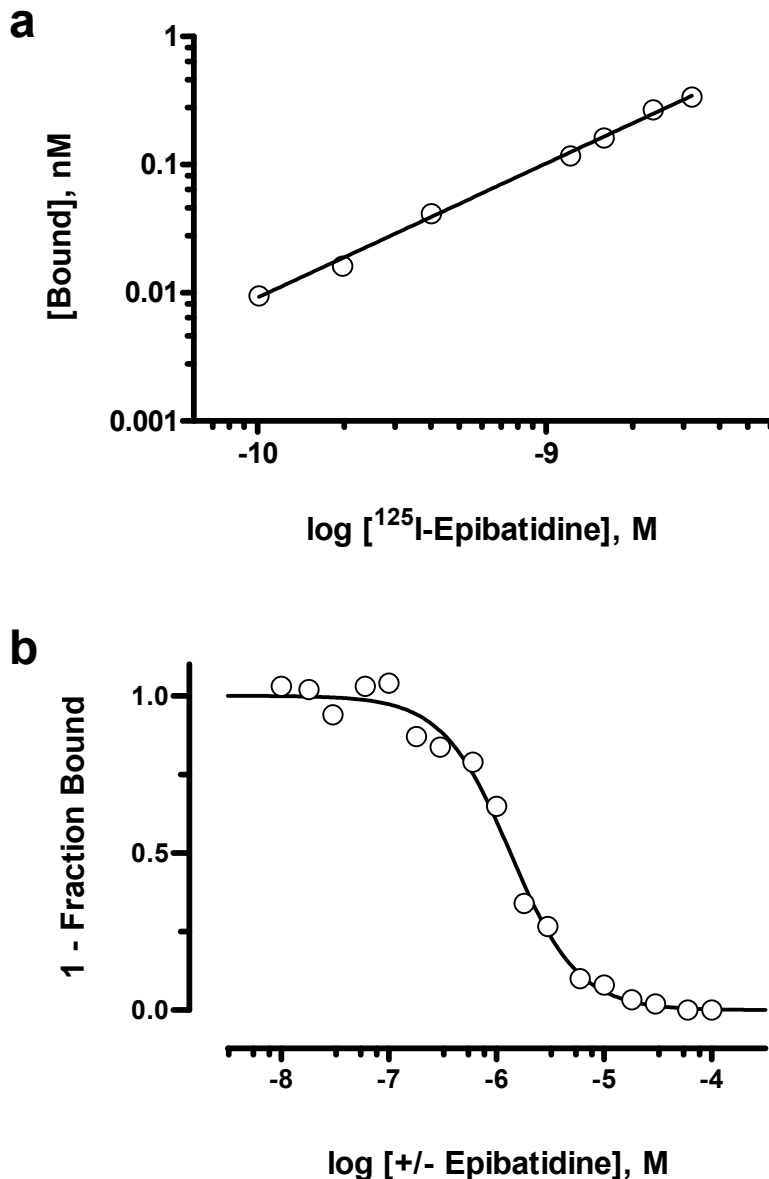

**Fig. S3-** Representative regions of the Apo structure showing well-defined electron density. **a.** Simulated annealing omit map calculated for the loop C region contoured at  $3.0\sigma$  level. **b.** 2Fo-Fc electron density map for loop F and the surrounding  $\beta$ -strand 9, contoured at  $1.0\sigma$  level. Key residues are labeled.

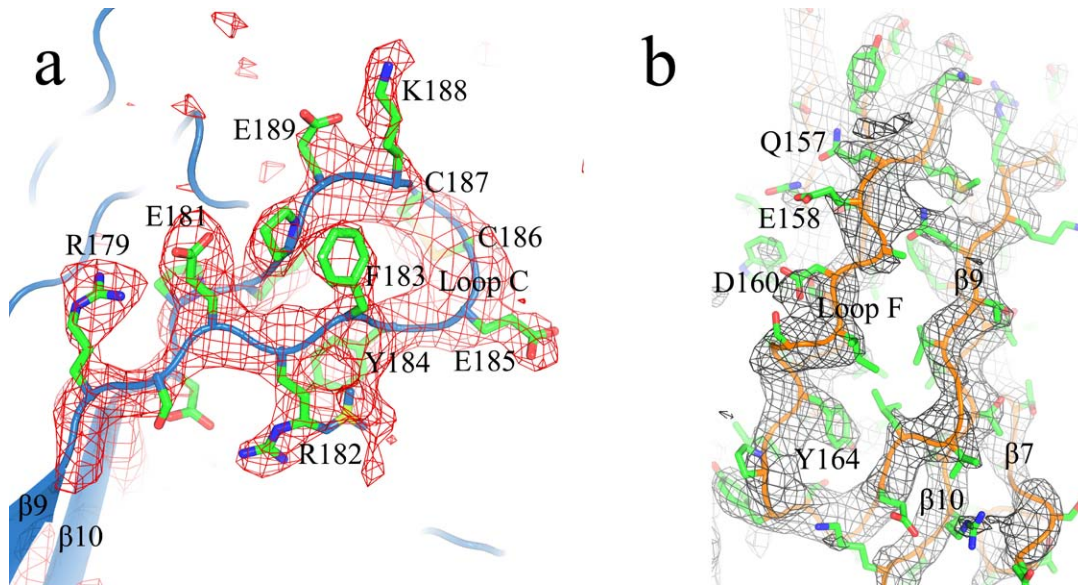

**Fig. S4-** Representative regions of the Epi structure showing well-defined electron density. **a.** Simulated annealing omit map calculated for the loop C region contoured at  $3.0\sigma$  level. **b.** 2Fo-Fc electron density map for  $\beta$ -strand 10 and part of the inner  $\beta$ -sheet, contoured at  $1.0\sigma$  level. Key residues are labeled.

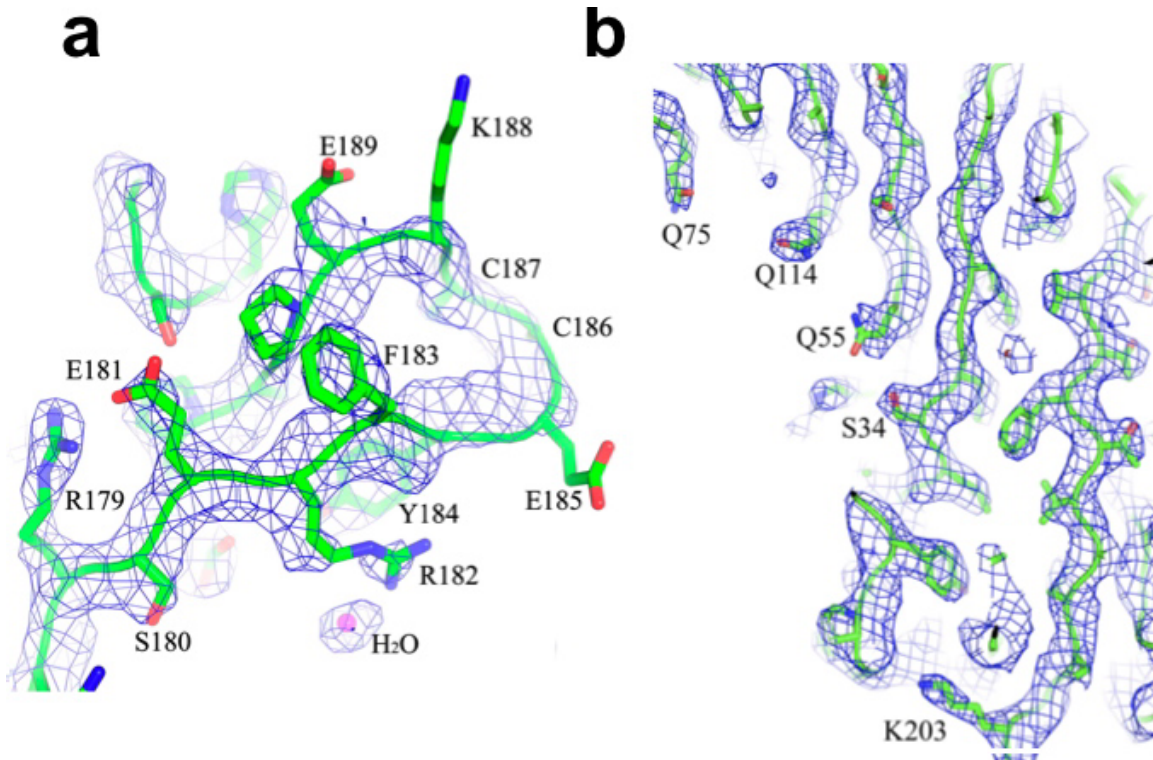

**Fig. S5-** Structure superposition of the  $\alpha_7$ /AChBP chimera (blue) and AChBP (orange) shows that the N-terminal helix ( $\alpha_1$ ) is positioned differently with respect to the  $\beta_2$ - $\beta_3$  loop in the two structures.

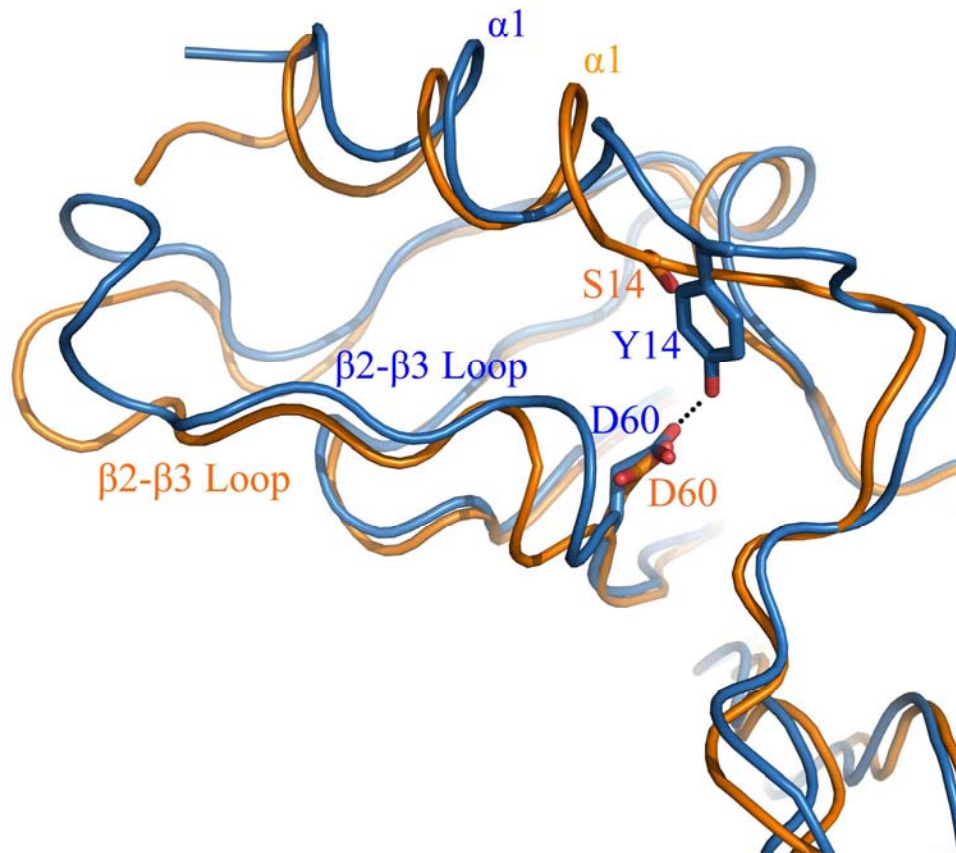



**Fig. S6-** Structure superposition between the  $\alpha_7$ /AChBP chimera (blue) and AChBP (orange) viewed from the bottom. This comparison shows the different positions of the  $\beta 1$ - $\beta 2$  loop and the F loop in the two structures.

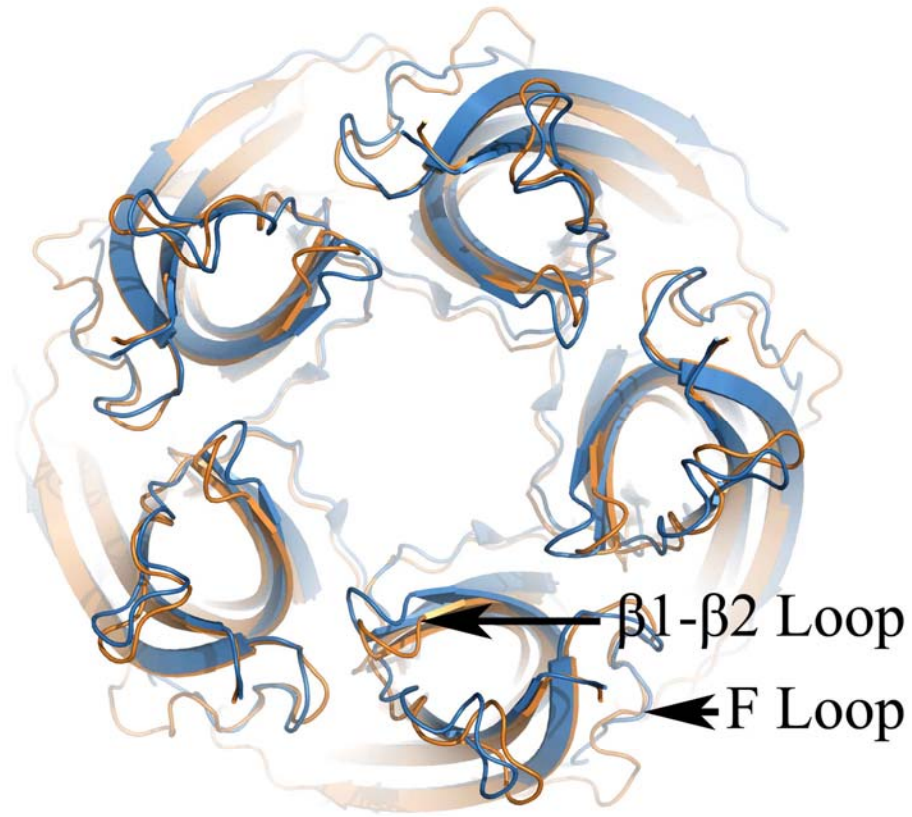



**Fig. S7-** Comparison of epibatidine binding by AChBP (pdb code 2BYQ) and the  $\alpha_7$ /AChBP chimera (blue) in stereo. The structures are superimposed by aligning the  $\beta$ -sandwich core. Key residues of both structures are labeled for reference.

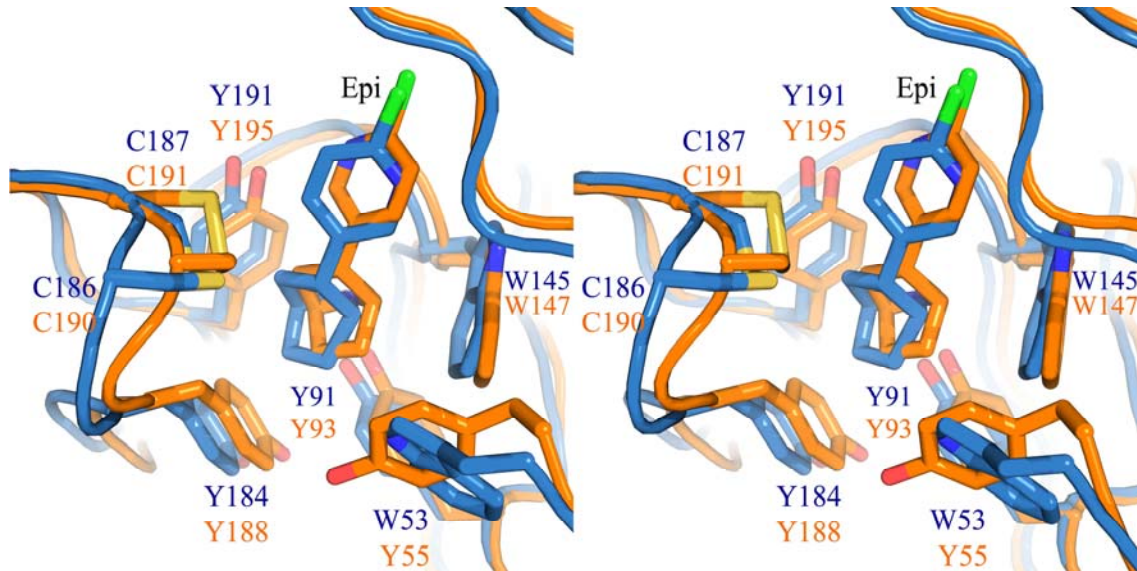

**Fig. S8-** Comparison of ligand binding pockets of the  $\alpha_7$ /AChBP chimera and AChBP in stereo. The  $\alpha_7$ /AChBP chimera is shown in blue and AChBP in yellow. Only residues from the chimera are labeled. The 2Fo-Fc electron density map is contoured at  $3.0\sigma$  level. A strong density (red mesh) coincides with the position of the quaternary ammonium moiety of carbamylcholine (CCh) bound to AChBP<sup>2</sup>.

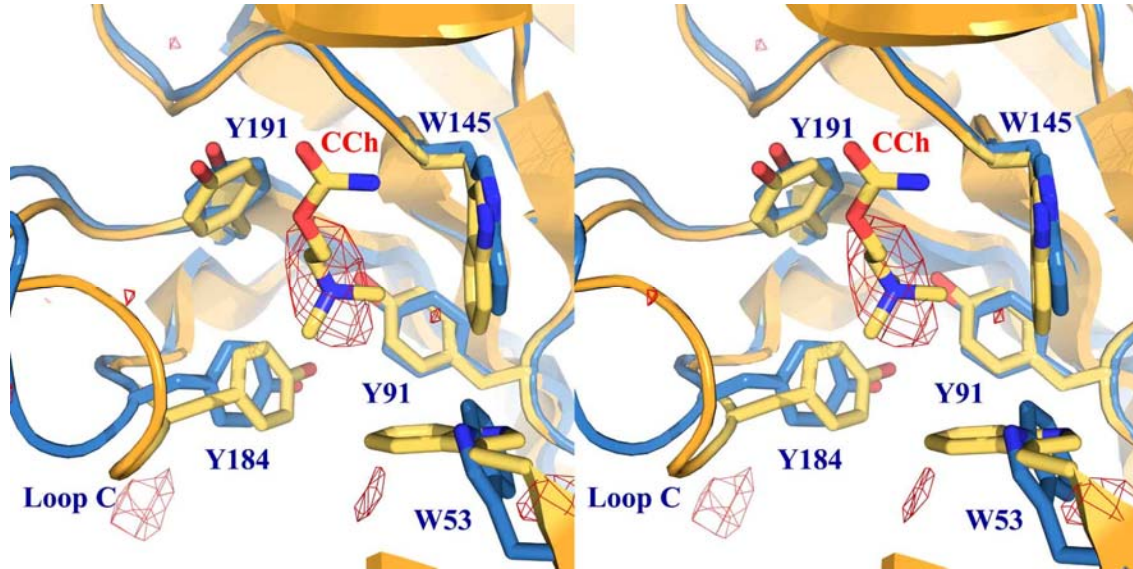

**Fig. S9-** The binding of epibatidine induces a concerted, counterclockwise rotation of the  $\alpha 1$ - $\beta 1$  loop, loop B and loop C at the top part of the subunit when viewed down the pentamer axis. The Apo structure is in orange while the Epi structure is in blue. This rotation alters the interface interaction with the adjacent subunit, leading to the stabilization of the N-terminus of helix  $\alpha 1$  on the complementary subunit.

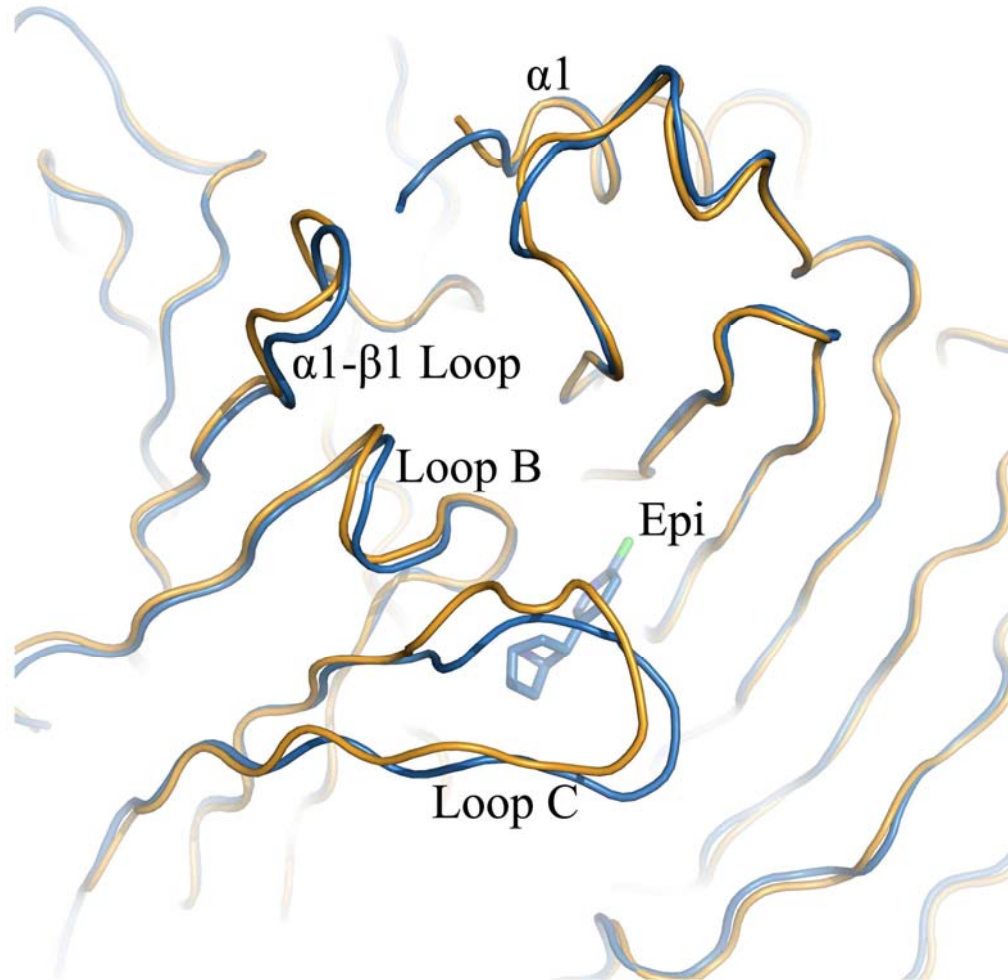

**Fig. S10-** Electron density for the highly ordered assembly beneath loop C in the Epi structure. The 2Fo-Fc electron density map is contoured at 1.5 $\sigma$  level. Key residues including Tyr184, Tyr91, Lys141, and Arg182 are labeled.

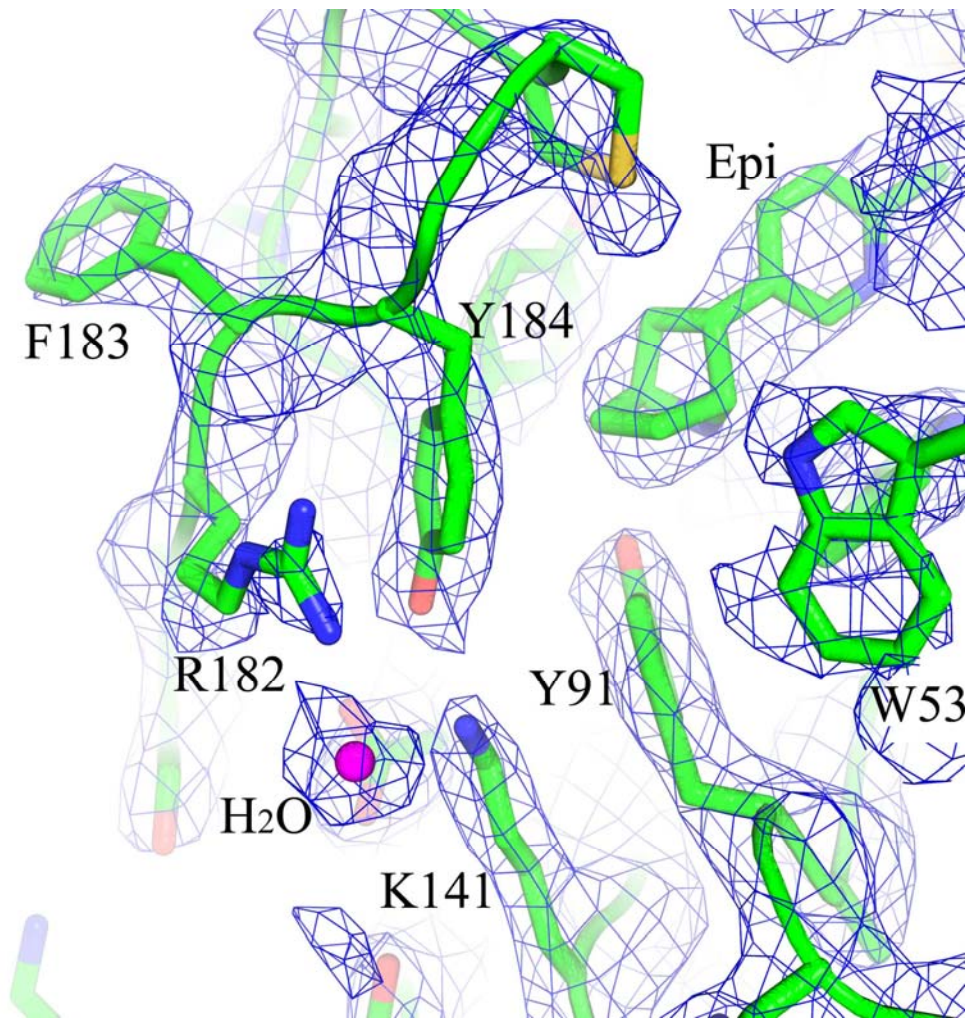



**Fig. S11-** Interactions at the linkage region between loops C and F within the same subunit are largely maintained between the Apo (orange) and Epi (blue) structures.

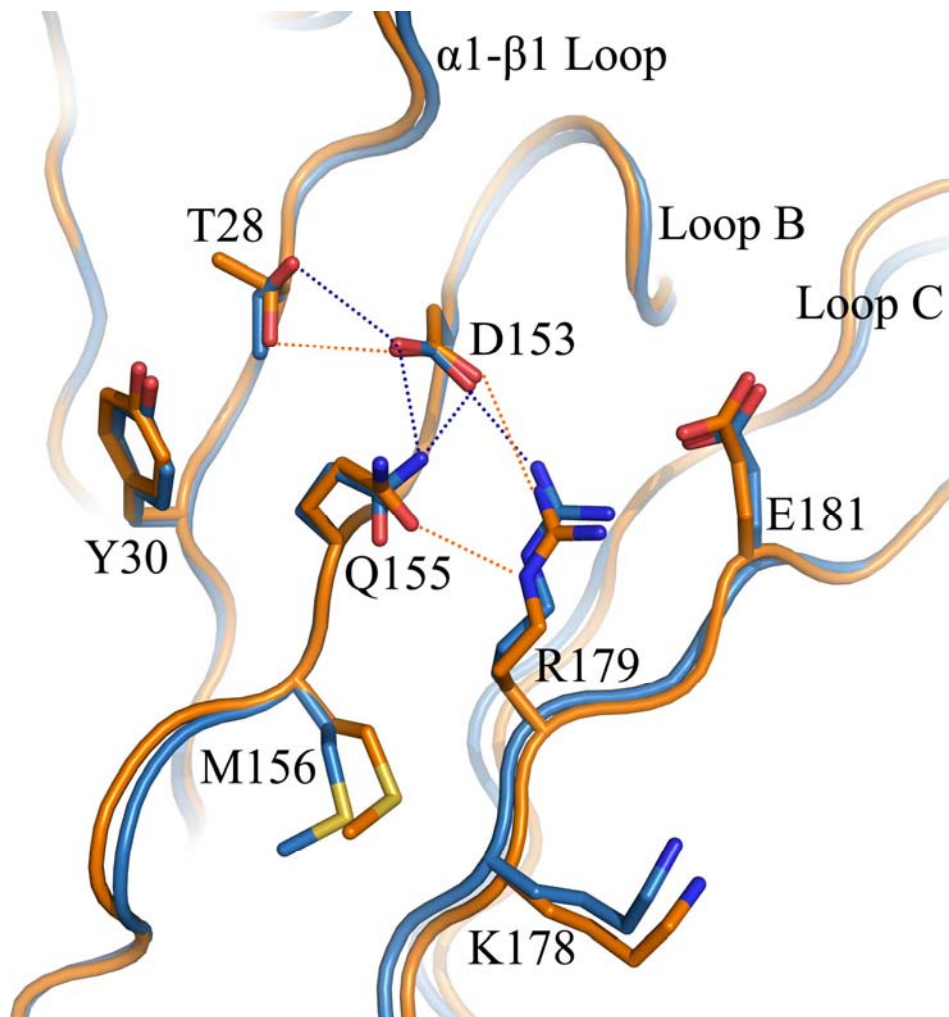

Supplement: NIHMS410628-supplement-1.pdf [file NIHMS410628-supplement-1.pdf]
